# Supplementary material
Source: HighWire-hosted journal article supplement (https://bmjopen.bmj.com/content/6/12/e013221)
Supplement: inline-supplementary-material-1 [file inline-supplementary-material-1.pdf]

## SUPPLEMENT MATERIAL

Supplement Table 1 Body size and blood pressure at 11-13y, 14-16y and 21-23y, and blood bio-markers at 21-23y, by ethnicity, age and gender in the DASH study

|                           |        | Whites UK           | Black Caribbean     | Black African        | Indian                 | Pakistani/Bangladeshi  | Others                |
|---------------------------|--------|---------------------|---------------------|----------------------|------------------------|------------------------|-----------------------|
| <b>Males</b>              |        |                     |                     |                      |                        |                        |                       |
| Height                    | 11-13y | 155.6 (153.8,157.4) | 157.9 (156.1,159.8) | 158.9 (157.2,160.6)* | 151.0 (149.1,152.8)    | 152.5 (150.8,154.3)    | 154.9 (153.1,156.6)   |
|                           | 14-16y | 172.5 (171.0,174.1) | 171.9 (170.3,173.5) | 172.7 (171.2,174.1)  | 166.2 (164.6,167.8)**  | 166.9 (165.4,168.4)**  | 170.8 (168.6,173.0)   |
|                           | 21-23y | 179.1 (177.8,180.5) | 177.7 (176.3,179.1) | 178.4 (177.2,179.7)  | 173.0 (171.6,174.4)**  | 172.8 (171.5,174.2)**  | 175.4 (174.1,176.7)** |
| Weight                    | 11-13y | 47.6 (44.1,51.0)    | 53.8 (50.3,57.4)    | 54.0 (50.8,57.2)     | 45.3 (41.8,48.8)       | 44.9 (41.6,48.2)       | 51.5 (48.1,54.8)      |
|                           | 14-16y | 58.4 (55.4,61.5)    | 65.9 (62.8,69.0)    | 65.4 (62.6,68.2)*    | 54.5 (51.4,57.6)       | 54.8 (51.9,57.8)       | 63.4 (59.1,67.6)      |
|                           | 21-23y | 76.6 (73.5,79.7)    | 82.1 (78.9,85.3)    | 82.0 (79.1,84.9)     | 71.5 (68.3,74.8)       | 73.2 (70.2,76.2)       | 75.7 (72.6,78.7)      |
| Waist                     | 11-13y | 66.1 (64.2,68.0)    | 67.5 (65.5,69.4)    | 64.6 (65.9,69.4)     | 65.6 (63.6,67.5)       | 64.9 (63.1,66.7)       | 66.4 (64.5,68.2)      |
|                           | 14-16y | 72.6 (70.4,74.8)    | 74.9 (72.7,77.1)    | 75.2 (73.2,77.2)     | 70.1 (68.0,72.3)       | 71.0 (69.0,73.1)       | 74.7 (71.6,77.7)      |
|                           | 21-23y | 83.9 (81.3,86.5)    | 84.9 (82.2,87.5)    | 85.3 (82.9,87.7)     | 83.9 (81.3,86.6)       | 84.4 (82.0,86.9)       | 83.2 (80.8,85.7)      |
| Waist height ratio        | 11-13y | 0.43 (0.41,0.44)    | 0.43 (0.42,0.44)    | 0.43 (0.41,0.44)     | 0.44 (0.42,0.45)       | 0.43 (0.41,0.44)       | 0.43 (0.42,0.44)      |
|                           | 14-16y | 0.42 (0.41,0.43)    | 0.44 (0.42,0.45)    | 0.44 (0.42,0.45)     | 0.42 (0.41,0.43)       | 0.43 (0.41,0.44)       | 0.44 (0.42,0.45)      |
|                           | 21-23y | 0.47 (0.45,0.48)    | 0.48 (0.46,0.49)    | 0.48 (0.46,0.49)     | 0.48 (0.47,0.50)       | 0.49 (0.47,0.50)       | 0.47 (0.46,0.49)      |
| % Overweight/Obese        | 11-13y | 16.7 (10.6,25.4)    | 39.4 (29.6,50.2)    | 37.6 (28.8,47.3)     | 25.3 (17.3,35.3)       | 18.0 (11.7,26.6)       | 31.0 (22.6,40.8)*     |
|                           | 14-16y | 10.3 (5.8,17.7)     | 30.4 (22.2,40.0)    | 31.1 (23.7,39.5)*    | 17.3 (11.0,16.2)       | 13.5 (8.3,21.3)        | 11.3 (6.6,18.5)       |
|                           | 21-23y | 35.2 (26.1,45.6)    | 53.0 (42.5,63.3)    | 47.0 (37.6,56.6)     | 38.1 (28.4,48.8)       | 38.3 (29.2,48.3)       | 36.7 (27.7,46.8)      |
| Systolic blood pressure   | 11-13y | 110.4 (108.4,112.4) | 109.7 (107.6,111.7) | 110.3 (108.4,112.1)  | 108.7 (106.6,110.7)    | 107.4 (105.4,109.3)    | 108.7 (106.7,110.6)   |
|                           | 14-16y | 116.1 (114.0,118.2) | 117.1 (114.9,119.2) | 117.5 (115.6,119.5)  | 113.9 (111.8,116.0)    | 114.0 (112.0,116.0)*   | 114.5 (111.5,117.4)   |
|                           | 21-23y | 112.5 (120.6,124.5) | 121.4 (119.4,123.4) | 121.3 (119.5,123.2)  | 118.9 (116.9,120.9)**  | 117.3 (115.4,119.2)*** | 119.2 (117.4,121.1)** |
| HbA1c, mmol/mol           | 21-23y | 34.1 (33.03,35.2)   | 36.0 (34.9,37.2)    | 35.0 (33.9,36.0)     | 35.0 (33.9,36.1)       | 34.4 (33.4,35.5)       | 34.5 (33.5,35.6)      |
| HDL Cholesterol, mmol/l   | 21-23y | 1.48 (1.40,1.56)    | 1.52 (1.43,1.60)    | 1.50 (1.42,1.58)     | 1.33 (1.25,1.42)*      | 1.40 (1.31,1.48)*      | 1.46 (1.38,1.54)      |
| Total Cholesterol, mmol/l | 21-23y | 4.28 (4.10,4.47)    | 4.29 (4.09,4.48)    | 4.02 (3.84,4.20)*    | 4.31 (4.12,5.41)       | 4.51 (4.33,4.69)*      | 4.27 (4.10,4.45)      |
| Allostatic Load           | 21-23y | 2.92 (2.55,3.29)    | 2.96 (2.57,3.34)    | 2.63 (2.25,3.01)     | 2.69 (2.31,3.08)       | 2.63 (2.26,3.01)       | 2.49 (2.13,2.84)      |
| <b>Females</b>            |        |                     |                     |                      |                        |                        |                       |
| Height                    | 11-13y | 155.9 (154.1,157.6) | 158.2 (156.3,160.0) | 159.2 (157.6,160.8)  | 151.2 (149.3,153.1)*** | 152.8 (151.0,154.8)**  | 155.1 (153.4,156.9)   |
|                           | 14-16y | 164.1 (162.5,165.7) | 163.4 (161.8,164.9) | 164.2 (162.8,165.5)  | 157.7 (156.1,159.3)*** | 158.4 (156.8,160.0)*** | 162.3 (160.2,164.5)*  |
|                           | 21-23y | 166.0 (164.6,167.3) | 164.5 (163.1,165.9) | 165.3 (164.1,166.5)  | 159.8 (158.4,161.3)*** | 159.7 (158.3,161.1)*** | 162.3 (160.9,163.6)** |
| Weight                    | 11-13y | 48.8 (45.4,52.2)    | 55.0 (51.5,58.5)*** | 55.2 (52.1,58.3)**   | 46.5 (42.9,50.1)       | 46.1 (42.7,49.6)       | 52.7 (49.3,56.0)      |
|                           | 14-16y | 54.5 (51.4,57.6)    | 62.0 (59.0,65.0)*** | 61.5 (58.9,64.2)**   | 50.6 (47.4,53.7)       | 50.9 (47.9,54.0)       | 59.5 (55.3,63.6)      |
|                           | 21-23y | 65.7 (62.6,68.8)    | 71.1 (68.0,74.3)**  | 71.1 (68.3,73.9)*    | 60.6 (57.3,63.9)       | 62.2 (59.1,65.3)       | 64.7 (61.7,67.7)      |
| Waist                     | 11-13y | 66.3 (64.4,68.2)    | 67.7 (65.7,69.6)*   | 67.8 (66.1,69.5)*    | 65.8 (63.8,67.8)       | 65.1 (63.2,67.0)       | 66.6 (64.7,68.4)      |
|                           | 14-16y | 70.2 (68.0,72.4)    | 72.5 (70.3,74.6)*   | 72.8 (70.9,74.6)*    | 67.7 (65.5,70.0)       | 68.6 (66.4,70.8)       | 72.3 (69.3,75.2)      |
|                           | 21-23y | 79.8 (77.3,82.4)    | 80.8 (78.2,83.4)*   | 81.3 (78.9,83.7)     | 79.9 (77.2,82.6)       | 80.4 (77.9,83.0)       | 79.2 (76.7,81.7)      |

|                           |        |                     |                     |                     |                     |                      |                     |
|---------------------------|--------|---------------------|---------------------|---------------------|---------------------|----------------------|---------------------|
| Waist height ratio        | 11-13y | 0.43 (0.41,0.44)    | 0.43 (0.42,0.44)*   | 0.43 (0.42,0.44)    | 0.45 (0.42,0.45)    | 0.43 (0.41,0.44)     | 0.43 (0.42,0.44)    |
|                           | 14-16y | 0.43 (0.42,0.44)    | 0.44 (0.43,0.46)**  | 0.44 (0.43,0.45)*   | 0.43 (0.42,0.44)    | 0.43 (0.42,0.45)     | 0.44 (0.43,0.46)    |
|                           | 21-23y | 0.48 (0.47,0.50)    | 0.49 (0.48,0.51)**  | 0.49 (0.48,0.51)    | 0.50 (0.48,0.51)*   | 0.50 (0.49,0.52)     | 0.49 (0.47,0.50)    |
| % Overweight/Obese        | 11-13y | 18.7 (12.0,27.9)    | 42.7 (32.8,53.2)*** | 40.8 (32.1,50.2)**  | 27.9 (19.3,38.6)    | 20.1 (13.1,29.5)     | 33.9 (25.1,44.0)    |
|                           | 14-16y | 12.8 (7.0,22.1)     | 33.8 (24.3,44.8)**  | 34.2 (25.6,44.0)**  | 19.9 (12.3,30.5)    | 16.2 (9.7,26.0)      | 29.3 (17.6,44.7)*   |
|                           | 21-23y | 30.3 (22.0,40.2)    | 47.4 (37.3,57.7)**  | 41.5 (32.9,50.7)*   | 33.0 (23.9,43.5)    | 33.2 (24.4,43.2)     | 31.7 (23.4,41.4)    |
| Systolic blood pressure   | 11-13y | 108.3 (106.3,110.3) | 107.6 (105.6,109.6) | 108.2 (106.4,110.0) | 106.6 (104.5,108.7) | 105.3 (103.3,107.3)  | 106.6 (104.7,108.5) |
|                           | 14-16y | 106.8 (104.6,108.9) | 107.8 (105.7,109.8) | 108.2 (106.4,110.0) | 104.6 (102.4,106.8) | 104.7 (102.5,106.8)  | 105.1 (102.2,108.0) |
|                           | 21-23y | 109.7 (107.8,111.7) | 108.6 (106.6,110.5) | 108.5 (106.8,110.3) | 106.1 (104.1,108.2) | 104.5 (102.6,106.5)* | 106.4 (104.6,108.3) |
| HbA1c, mmol/mol           | 21-23y | 33.5 (32.4,34.6)    | 35.4 (34.3,36.5)*   | 34.3 (33.3,35.4)    | 34.4 (33.2,35.5)    | 33.8 (32.7,34.9)     | 33.9 (32.8,34.9)    |
| HDL Cholesterol, mmol/l   | 21-23y | 1.65 (1.57,1.73)    | 1.69 (1.60,1.77)    | 1.67 (1.59,1.75)    | 1.50 (1.42,1.59)    | 1.57 (1.48,1.65)     | 1.64 (1.56,1.72)    |
| Total Cholesterol, mmol/l | 21-23y | 4.39 (4.20,4.57)    | 4.39 (4.20,4.57)    | 4.12 (3.94,4.29)    | 4.42 (4.22,4.61)    | 4.61 (4.42,4.80)     | 4.38 (4.20,4.55)    |
| Allostatic Load           | 21-23y | 2.29 (1.91,2.66)    | 2.32 (1.94,2.70)    | 2.00 (1.62,2.37)    | 2.06 (1.66,2.46)    | 2.00 (1.61,2.38)     | 1.85 (1.49,2.21)    |

\*p<0.05, \*\*p<0.01, \*\*\*p<0.001. P-values were derived from simple linear/logistic (overweight) regression models with ethnicity as an independent variable.

Supplement Table 2: Diastolic blood pressure from adolescence to early adulthood for males and females in the DASH study: association with longitudinal measures of adiposity\*

| Covariates                              | Waist to height ratio |               |         | Overweight Status |               |         |
|-----------------------------------------|-----------------------|---------------|---------|-------------------|---------------|---------|
|                                         | Coef                  | 95% CI        | p-value | Coef              | 95% CI        | p-value |
| <b>Males</b>                            |                       |               |         |                   |               |         |
| <b>Waist to height ratio</b>            | 0.32                  | (20.8,43.6)   | <0.001  | -                 | -             | -       |
| <b>Overweight (Normal weight - Ref)</b> |                       |               |         |                   |               |         |
| Overweight/Obese                        | -                     | -             | -       | 2.91              | (0.36,4.02)   | 0.019   |
| <b>Age (11-13y - Ref)</b>               |                       |               |         |                   |               |         |
| 14-16y                                  | 49.5                  | (48.2,50.9)   | <0.001  | 49.5              | (49.1,50.9)   | <0.001  |
| 21-23y                                  | 51.7                  | (50.3,53.2)   | <0.001  | 53.8              | (52.3,55.3)   | <0.001  |
| <b>Ethnicity (White UK - Ref)</b>       |                       |               |         |                   |               |         |
| Black Caribbean                         | -0.76                 | (-3.54,2.01)  | 0.589   | -1.32             | (-4.16,1.51)  | 0.359   |
| Black African                           | -0.90                 | (-3.53,1.74)  | 0.504   | -1.36             | (-4.06,1.34)  | 0.324   |
| Indian                                  | -2.14                 | (-4.84,0.56)  | 0.121   | -2.26             | (-5.02,0.49)  | 0.107   |
| Pakistani/Bangladeshi                   | -4.54                 | (-7.14,-1.93) | 0.001   | -4.34             | (-7.0,-1.68)  | 0.001   |
| Others                                  | -4.01                 | (-6.72,-1.31) | 0.004   | -4.14             | (-6.91,1.37)  | 0.003   |
| <b>Employment</b>                       |                       |               |         |                   |               |         |
| No                                      | 0.33                  | (-1.25,1.92)  | 0.680   | 0.23              | (-1.35, 1.81) | 0.776   |
| Not stated                              | 0.98                  | (-1.3,3.27)   | 0.401   | 0.62              | (-1.65,2.89)  | 0.594   |
| <b>Smoking</b>                          |                       |               |         |                   |               |         |
| Yes                                     | 0.90                  | (-0.6,2.41)   | 0.238   | 0.96              | (-0.55,2.47)  | 0.215   |
| Not stated                              | 2.09                  | (0.33,3.85)   | 0.020   | 2.30              | (0.54,4.05)   | 0.011   |
| <b>Females</b>                          |                       |               |         |                   |               |         |
| <b>Waist to height ratio</b>            | 28.7                  | (20.2,37.1)   | <0.001  | -                 | -             | -       |
| <b>Overweight (Normal weight - Ref)</b> |                       |               |         |                   |               |         |
| Overweight/Obese                        | -                     | -             | -       | 3.09              | (1.70,4.48)   | <0.001  |
| <b>Age (11-13y - Ref)</b>               |                       |               |         |                   |               |         |
| 14-16y                                  | 39.5                  | (38.4,40.6)   | <0.001  | 39.9              | (38.8,41.0)   | <0.001  |
| 21-23y                                  | 39.1                  | (37.8,40.3)   | <0.001  | 41.9              | (40.7,43.1)   | <0.001  |
| <b>Ethnicity (White UK - Ref)</b>       |                       |               |         |                   |               |         |
| Black Caribbean                         | 0.37                  | (-1.73,2.47)  | 0.728   | 0.72              | (-1.43,2.87)  | 0.511   |
| Black African                           | 0.63                  | (-1.36,2.62)  | 0.536   | 0.71              | (-1.32,2.73)  | 0.495   |
| Indian                                  | -1.51                 | (-3.72,0.71)  | 0.182   | -1.19             | (-3.44,1.06)  | 0.301   |
| Pakistani/Bangladeshi                   | -0.82                 | (-3.0,1.35)   | 0.457   | -0.50             | (-2.72,1.72)  | 0.658   |
| Others                                  | -1.03                 | (-3.1,1.1)    | 0.343   | -0.95             | (-3.12,1.22)  | 0.39    |
| <b>Employment</b>                       |                       |               |         |                   |               |         |
| No                                      | -0.44                 | (-1.64,0.76)  | 0.469   | -0.44             | (-1.65,0.75)  | 0.467   |

|         |            |      |              |       |      |               |       |
|---------|------------|------|--------------|-------|------|---------------|-------|
| Smoking | Not stated | 0.61 | (-1.57,2.78) | 0.581 | 0.38 | (-1.74,2.5)   | 0.725 |
|         | Yes        | 0.46 | (-0.78,1.71) | 0.467 | 0.57 | (-0.68,1.81)  | 0.372 |
|         | Not stated | 0.31 | (-1.02,1.65) | 0.648 | 0.06 | (-1.27, 1.39) | 0.931 |

---

\*Mixed-Effects Linear Regression Model with regression coefficients adjusted for age, ethnicity, waist to height ratio or overweight status, parental (11-13y and 14-16y)/own (21-23y) employment and currently Smoking

Supplement Table 3: The influence of change in waist to height ratio or overweight status on HbA1c at 21-23y in the DASH study

|                                                                        | HbA1c*                |               |         |                   |              |         |
|------------------------------------------------------------------------|-----------------------|---------------|---------|-------------------|--------------|---------|
|                                                                        | Waist to height ratio |               |         | Overweight Status |              |         |
|                                                                        | Coef                  | 95% CI        | p-value | Coef              | 95% CI       | p-value |
| <b>Males</b>                                                           |                       |               |         |                   |              |         |
| <b>Waist to height ratio change between 11-13y and 21-23y</b>          | -1.19                 | (-10.3, 7.9)  | 0.797   | -                 | -            | -       |
| <b>Weight change (Normal weight at 11-13y-normal weight at 21-23y)</b> |                       |               |         |                   |              |         |
| Normal weight at 11-13y-Overweight/Obese at 21-23y                     | -                     | -             | -       | -0.77             | (-2.05,0.51) | 0.24    |
| Overweight/Obese at 11-13y to Normal weight at 21-23y                  | -                     | -             | -       | 0.67              | (-1.46, 2.8) | 0.535   |
| Overweight/Obese at 11-13y to Overweight/Obese at 21-23y               | -                     | -             | -       | 0.89              | (-0.34,2.13) | 0.157   |
| <b>Ethnicity (White UK - Ref)</b>                                      |                       |               |         |                   |              |         |
| Black Caribbean                                                        | 0.93                  | (-0.86,2.72)  | 0.309   | 0.7               | (-1.06,2.45) | 0.435   |
| Black African                                                          | 0.71                  | (-1.04,2.47)  | 0.426   | 0.79              | (-0.9,2.48)  | 0.361   |
| Indian                                                                 | 1.26                  | (-0.46,2.98)  | 0.152   | 1.34              | (-0.34,3.02) | 0.118   |
| Pakistani/Bangladeshi                                                  | 0.65                  | (-1.01,2.32)  | 0.438   | 0.57              | (-1.03,2.18) | 0.481   |
| Others                                                                 | 0.52                  | (-1.78,2.81)  | 0.863   | -0.04             | (-1.69,1.61) | 0.962   |
| <b>Females</b>                                                         |                       |               |         |                   |              |         |
| <b>Waist to height ratio change between 11-13y and 21-23y</b>          | -3.04                 | (-14.3, 8.26) | 0.596   | -                 | -            | -       |
| <b>Weight change (Normal weight at 11-13y-normal weight at 21-23y)</b> |                       |               |         |                   |              |         |
| Normal weight at 11-13y-Overweight/Obese at 21-23y                     | -                     | -             | -       | 0.43              | (-1.72,2.59) | 0.691   |
| Overweight/Obese at 11-13y to Normal weight at 21-23y                  | -                     | -             | -       | 3.62              | (0.95,6.29)  | 0.008   |
| Overweight/Obese at 11-13y to Overweight/Obese at 21-23y               | -                     | -             | -       | 1.14              | (-0.58,2.86) | 0.193   |
| <b>Ethnicity (White UK - Ref)</b>                                      |                       |               |         |                   |              |         |
| Black Caribbean                                                        |                       |               |         |                   |              |         |
| Black African                                                          | 3.23                  | (0.73,5.72)   | 0.011   | 2.58              | (0.23,4.93)  | 0.031   |
| Indian                                                                 | 0.97                  | (-1.48,3.41)  | 0.426   | 0.46              | (-1.8,2.72)  | 0.688   |
| Pakistani/Bangladeshi                                                  | 0.46                  | (-2.22,3.15)  | 0.152   | 0.38              | (-2.11,2.87) | 0.763   |
| Others                                                                 | 0.00                  | (-2.54,2.54)  | 1.000   | -0.29             | (-2.72,2.15) | 0.817   |
|                                                                        | 0.79                  | (-1.65,3.23)  | 0.524   | 0.75              | (-1.55,3.06) | 0.521   |

\*Mixed-Effects Linear Regression Model with regression coefficients adjusted for age, ethnicity, waist to height ratio or overweight status

Supplement Table 4: The influence of change in waist to height ratio or overweight status on HDL and Total Cholesterol at 21-23y in the DASH study

| Males                                                                  |                       |               |         |                   |               |         |                       |               |         |                   |               |         |
|------------------------------------------------------------------------|-----------------------|---------------|---------|-------------------|---------------|---------|-----------------------|---------------|---------|-------------------|---------------|---------|
| Covariates                                                             | HDL Cholesterol*      |               |         |                   |               |         | Total Cholesterol*    |               |         |                   |               |         |
|                                                                        | Waist to height ratio |               |         | Overweight Status |               |         | Waist to height ratio |               |         | Overweight Status |               |         |
|                                                                        | Coef                  | 95% CI        | p-value | Coef              | 95% CI        | p-value | Coef                  | 95% CI        | p-value | Coef              | 95% CI        | p-value |
| <b>Waist to height ratio change between 11-13y and 21-23y</b>          | -1.59                 | (-2.29,-0.89) | <0.001  | -                 | -             | -       | 3.26                  | (1.46,5.05)   | <0.001  | -                 | -             | -       |
| <b>Weight change (Normal weight at 11-13y-normal weight at 21-23y)</b> |                       |               |         |                   |               |         |                       |               |         |                   |               |         |
| Normal weight at 11-13y-Overweight/Obese at 21-23y                     | -                     | -             | -       | -0.05             | (-14.8,0.05)  | 0.367   | -                     | -             | -       | 0.54              | (0.29,0.79)   | <0.001  |
| Overweight/Obese at 11-13y to Normal weight at 21-23y                  | -                     | -             | -       | 0.29              | (0.13,0.46)   | 0.001   | -                     | -             | -       | -0.06             | (-0.49,0.36)  | 0.78    |
| Overweight/Obese at 11-13y to Overweight/Obese at 21-23y               | -                     | -             | -       | -0.13             | (-0.22,-0.03) | 0.009   | -                     | -             | -       | 0.19              | (-0.05,0.44)  | 0.119   |
| <b>Ethnicity (White UK - Ref)</b>                                      |                       |               |         |                   |               |         |                       |               |         |                   |               |         |
| Black Caribbean                                                        | 0.14                  | (-0.01,27.7)  | 0.975   | 0.08              | (-0.05,0.22)  | 0.238   | -0.03                 | (-0.38,0.32)  | 0.793   | -0.08             | (-0.42,0.26)  | 0.646   |
| Black African                                                          | 0.05                  | (-0.09,0.19)  | 0.469   | -0.02             | (-0.15,0.11)  | 0.782   | -0.33                 | (-0.68,0.02)  | 0.062   | -0.23             | (-0.56,0.11)  | 0.181   |
| Indian                                                                 | -0.13                 | (-0.26,0.02)  | 0.054   | -0.18             | (-0.31,-0.05) | 0.006   | 0.20                  | (-0.14,0.55)  | 0.247   | 0.14              | (-0.19,0.47)  | 0.402   |
| Pakistani/Bangladeshi                                                  | -0.12                 | (-0.6,0.01)   | 0.063   | -0.18             | (-0.31,-0.05) | 0.006   | 0.29                  | (-0.04,0.62)  | 0.089   | 0.35              | (0.03,0.67)   | 0.031   |
| Others                                                                 | -0.04                 | (-0.09,16.9)  | 0.539   | -0.03             | (-0.16,0.10)  | 0.615   | 0.05                  | (-0.28,0.38)  | 0.778   | 0.05              | (-0.28,0.38)  | 0.753   |
| Females                                                                |                       |               |         |                   |               |         |                       |               |         |                   |               |         |
| <b>Waist to height ratio change between 11-13y and 21-23y</b>          | -1.15                 | (-1.92,-0.38) | 0.003   | -                 | -             | -       | 2.82                  | (1.22,4.43)   | 0.001   | -                 | -             | -       |
| <b>Overweight, 11-13y (Normal weight - Ref)</b>                        |                       |               |         |                   |               |         |                       |               |         |                   |               |         |
| Normal weight at 11-13y-Overweight/Obese at 21-23y                     | -                     | -             | -       | -0.08             | (-0.23,0.06)  | 0.261   | -                     | -             | -       | 0.38              | (0.07,0.69)   | 0.018   |
| Overweight/Obese at 11-13y to Normal weight at 21-23y                  | -                     | -             | -       | 0.09              | (-0.10,27.4)  | 0.341   | -                     | -             | -       | -0.12             | (-0.51,0.27)  | 0.562   |
| Overweight/Obese at 11-13y to Overweight/Obese at 21-23y               | -                     | -             | -       | -0.22             | (-0.34,-0.10) | <0.001  | -                     | -             | -       | 0.15              | (-0.10, 0.40) | 0.233   |
| <b>Ethnicity (White UK - Ref)</b>                                      |                       |               |         |                   |               |         |                       |               |         |                   |               |         |
| Black Caribbean                                                        | 0.05                  | (-0.12,0.22)  | 0.553   | 0.04              | (-0.12,0.21)  | 0.605   | -0.01                 | (-0.36,0.35)  | 0.989   | 0.01              | (-0.34,0.36)  | 0.965   |
| Black African                                                          | 0.07                  | (-0.10,0.23)  | 0.42    | 0.08              | (-0.07,0.24)  | 0.335   | -0.37                 | (-0.71,-0.02) | 0.034   | -0.30             | (-0.64,0.03)  | 0.074   |
| Indian                                                                 | -0.09                 | (-0.27,0.09)  | 0.31    | -0.12             | (-0.29,0.05)  | 0.182   | -0.17                 | (-0.55,0.20)  | 0.367   | -0.07             | (-0.44,0.29)  | 0.697   |
| Pakistani/Bangladeshi                                                  | 0.05                  | (-0.12,0.23)  | 0.569   | 0.01              | (-0.16,0.19)  | 0.863   | 0.03                  | (-0.33,0.39)  | 0.881   | 0.11              | (-0.25,0.47)  | 0.558   |
| Others                                                                 | -0.02                 | (-0.29,0.14)  | 0.786   | -0.03             | (-0.19,0.13)  | 0.72    | -0.10                 | (-0.45,0.24)  | 0.055   | -0.02             | (-0.36,0.32)  | 0.907   |

\* Linear Regression Model with regression coefficients adjusted for ethnicity and waist to height ratio or overweight status at 11-13y
